# Supplementary material for: Anisotropic X-ray photovoltaics in 2D trilayered hybrid perovskite EA4Pb3Br10 single crystals with a low detection limit
Source: Royal Society of Chemistry journal article supplement (doi:10.1039/d4qi00934g), 2024-01-01
Supplement: d4qi00934g1.pdf [file d4qi00934g1.pdf]

## Anisotropic X-ray Photovoltaics in 2D Trilayered Hybrid Perovskite

### EA<sub>4</sub>Pb<sub>3</sub>Br<sub>10</sub> Single Crystals with Low Detection Limit

Kewen Tao<sup>a</sup>, Chenwei Xiong<sup>b</sup>, Hui Yang<sup>a</sup>, Hao Lin<sup>b</sup>, Decai Ma<sup>b</sup>, Huashan Li<sup>a</sup>, Shaopeng Lin<sup>b,\*</sup> and Biao Wang<sup>a,\*\*</sup>

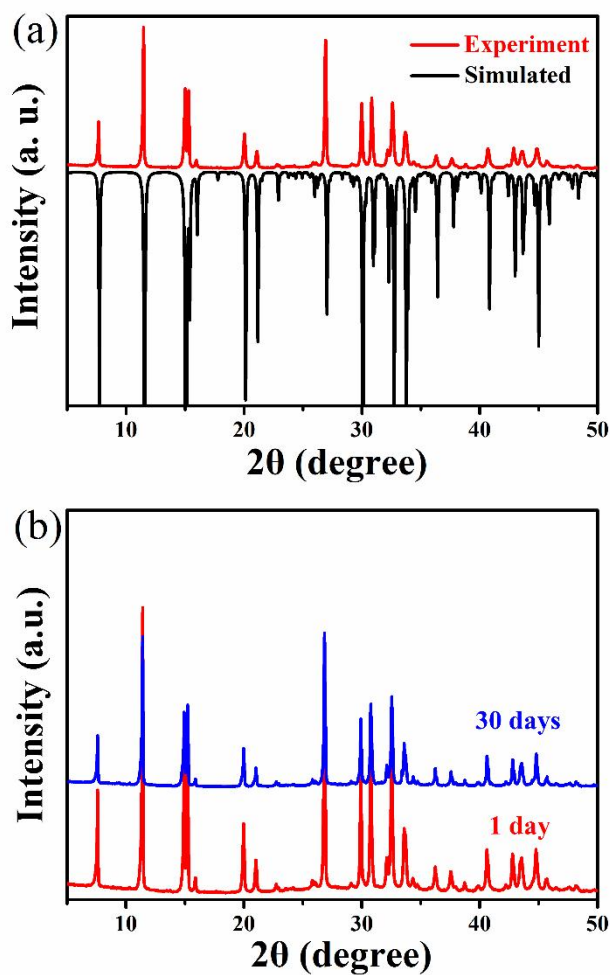

Fig. S1. a) Experiment and Simulated powder X-ray diffraction patterns of EA<sub>4</sub>Pb<sub>3</sub>Br<sub>10</sub>. b) Powder X-ray patterns of EA<sub>4</sub>Pb<sub>3</sub>Br<sub>10</sub> recorded on the freshly-prepared sample (1 day) and after 30 days.

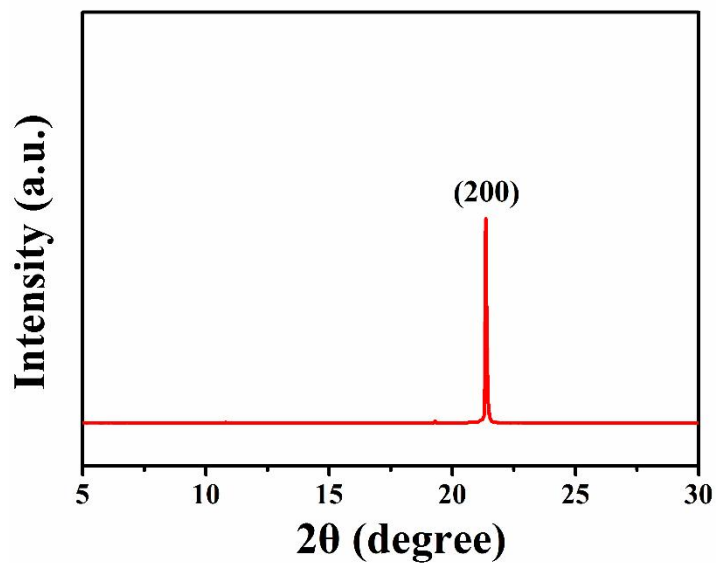

Fig. S2. XRD pattern of EA<sub>4</sub>Pb<sub>3</sub>Br<sub>10</sub> SC with the (h00) diffraction indices.

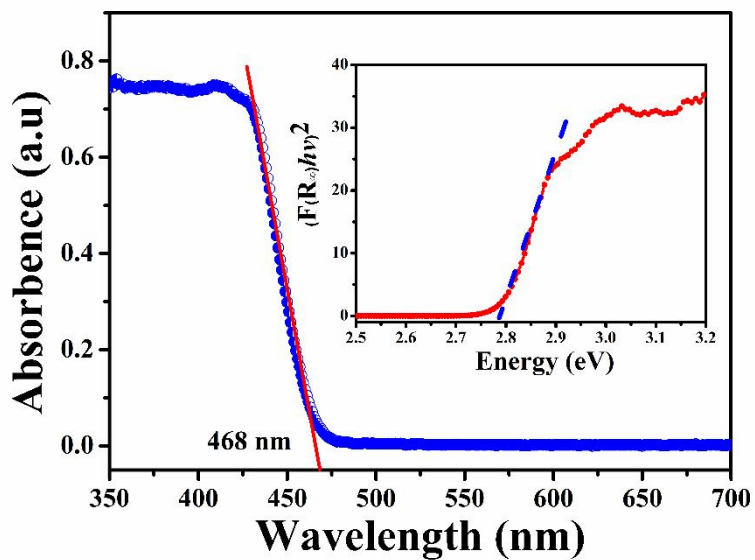

Fig. S3. UV-vis absorption spectrum of EA<sub>4</sub>Pb<sub>3</sub>Br<sub>10</sub>. Insert: estimated bandgap.

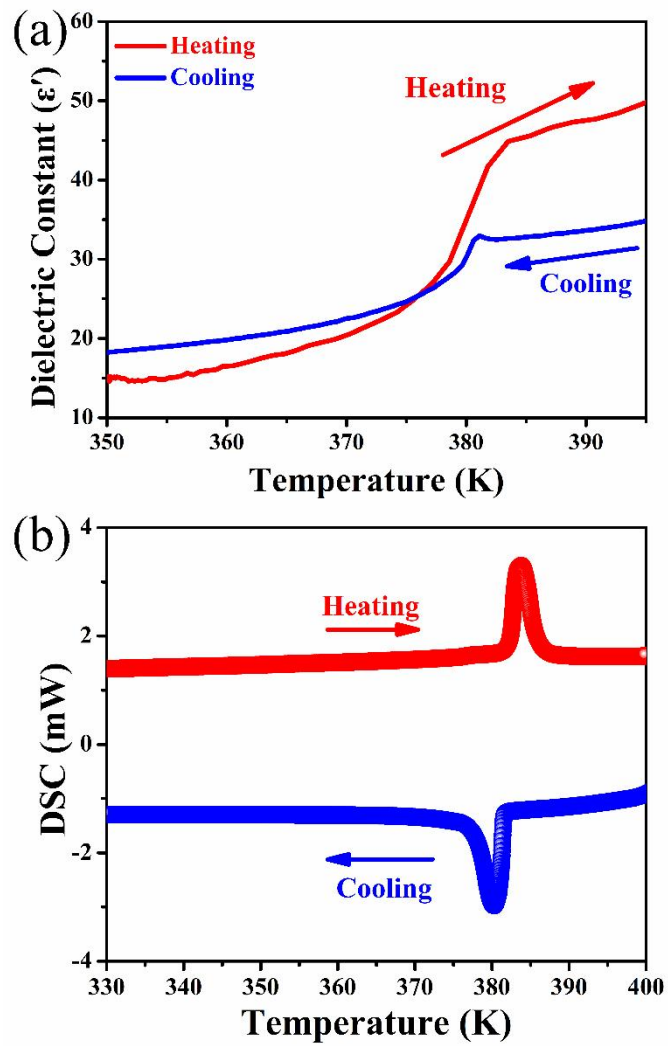

Fig. S4. a) Temperature-dependent dielectric constants ( $\epsilon'$ ) of EA<sub>4</sub>Pb<sub>3</sub>Br<sub>10</sub> along the  $a$ -axis directions measured at 300 kHz. b) The DSC curves of EA<sub>4</sub>Pb<sub>3</sub>Br<sub>10</sub>.

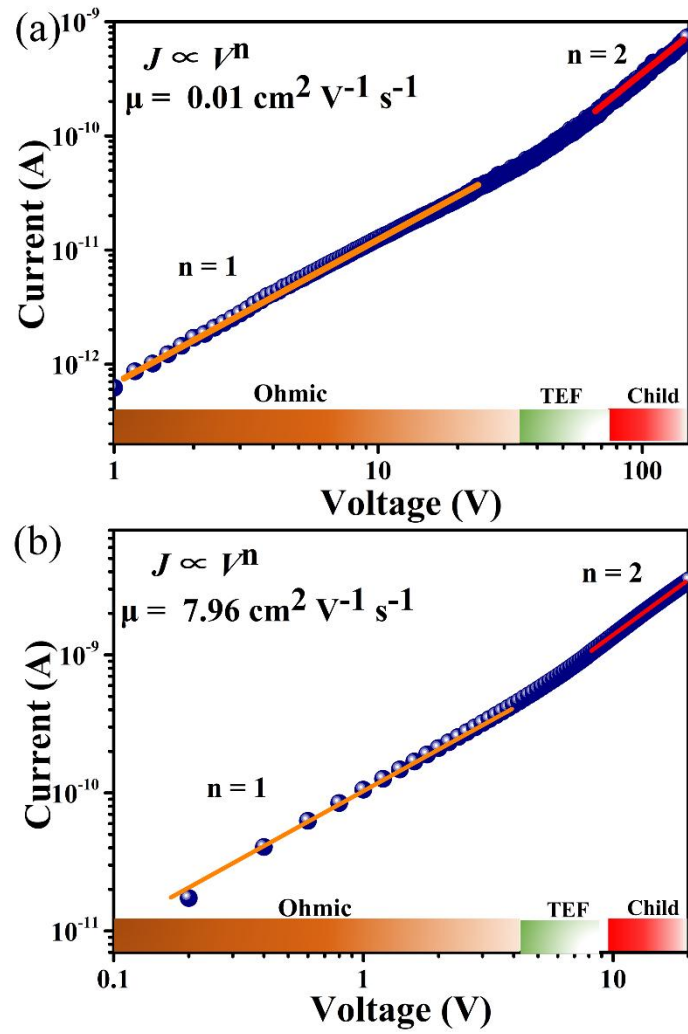

Fig. S5. Dark  $I$ - $V$  curve along a)  $b$ -axis and b)  $c$ -axis of  $\text{EA}_4\text{Pb}_3\text{Br}_{10}$  SC for SCLC analysis.

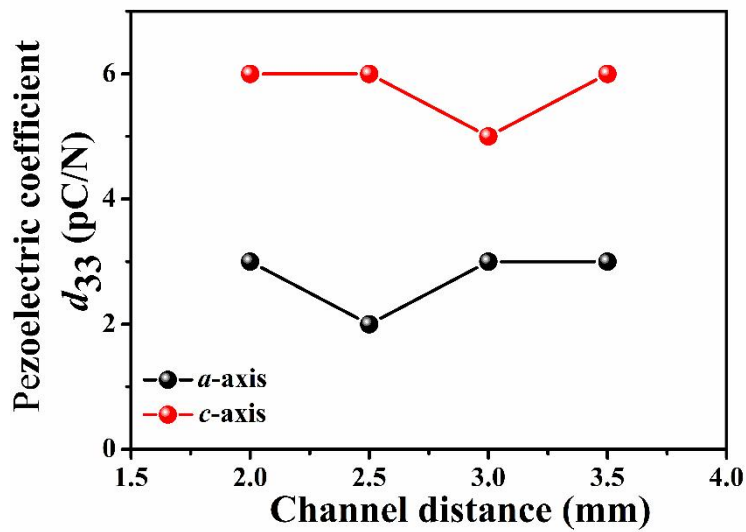

Fig. S6. The piezoelectric response versus channel distance plots for the  $a$ -axis and  $c$ -axis.

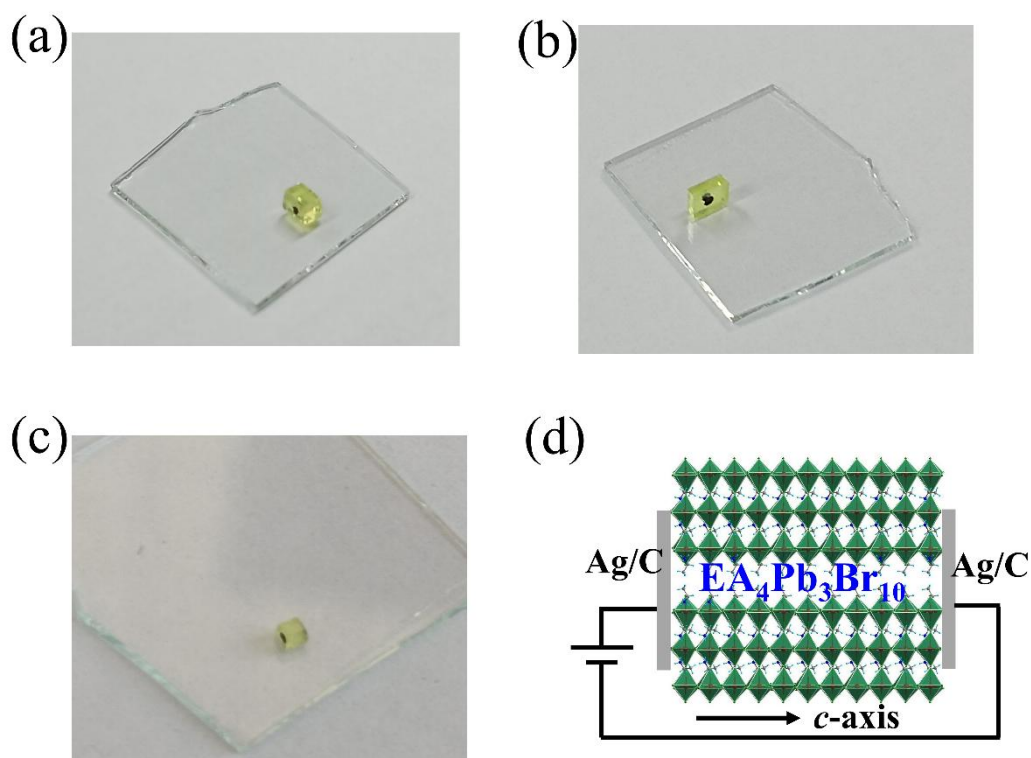

Fig. S7. Photograph of  $\text{EA}_4\text{Pb}_3\text{Br}_{10}$  SC devices along the  $a$ -axis a),  $b$ -axis b), and  $c$ -axis c). d) Device Schematic along the  $c$ -axis.

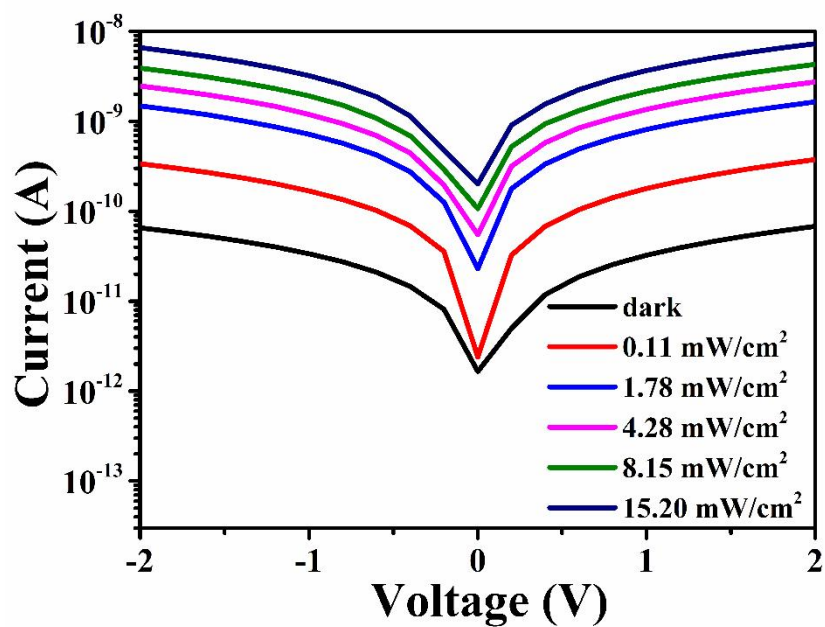

Fig. S8.  $I$ - $V$  curves under various light intensity along the  $c$ -axes of  $\text{EA}_4\text{Pb}_3\text{Br}_{10}$  SC.

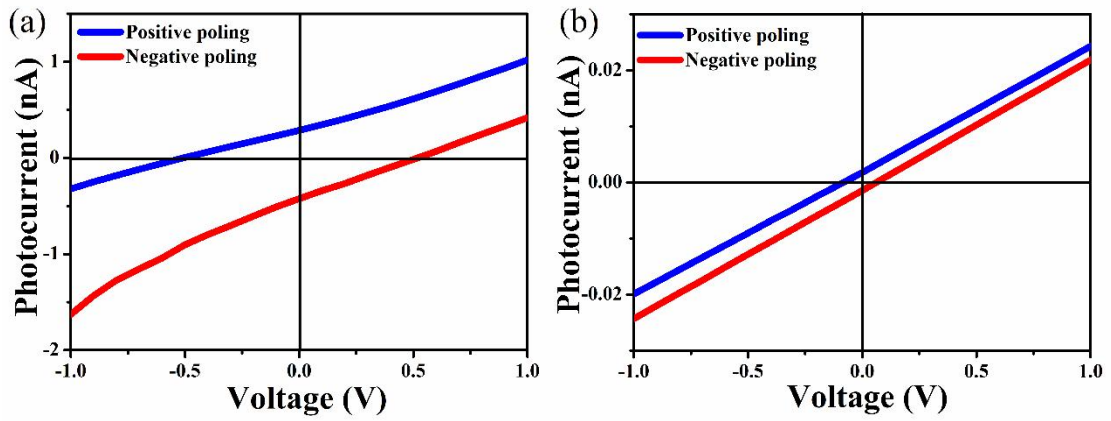

Fig. S9. a) Photocurrent-voltage curves of *c*-direction device after polarization treatment. b) Photocurrent-voltage curves of *b*-direction device in positive and negative polarization states.

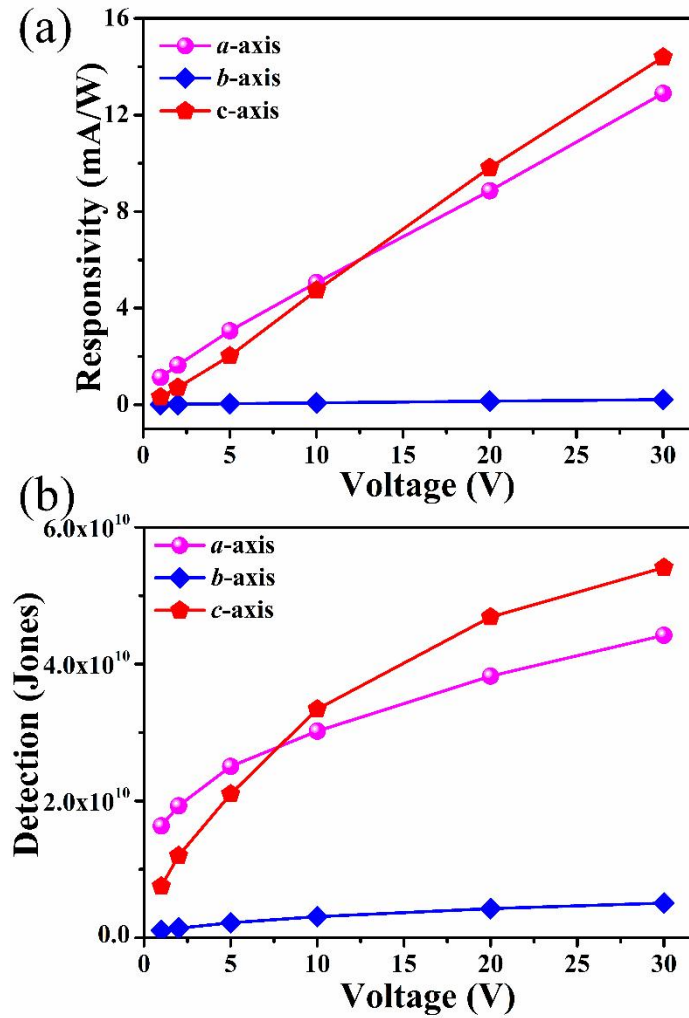

Fig. S10. a) Anisotropic responsivity  $R$  and b) detection  $D^*$  of  $\text{EA}_4\text{Pb}_3\text{Br}_{10}$  SCs measured at different bias voltage.

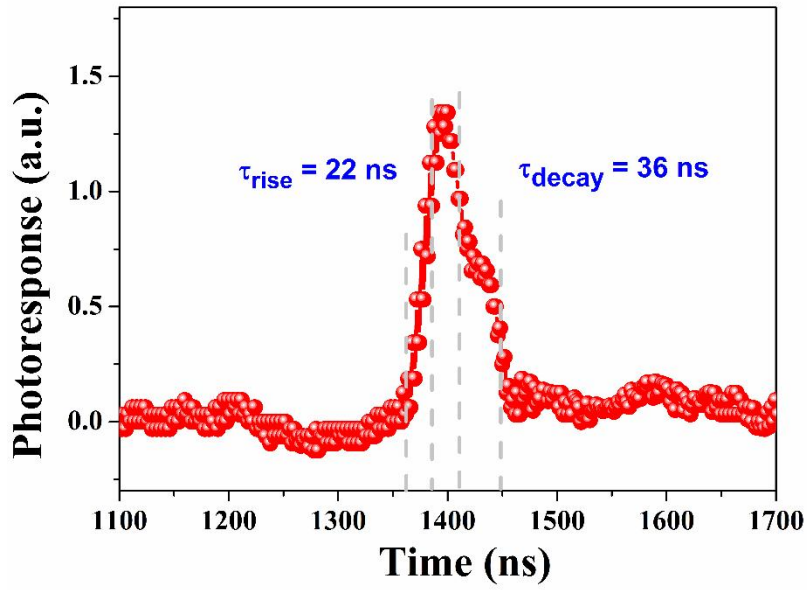

Fig. S11. Transient photoelectric responses under a nanosecond 450 nm laser.

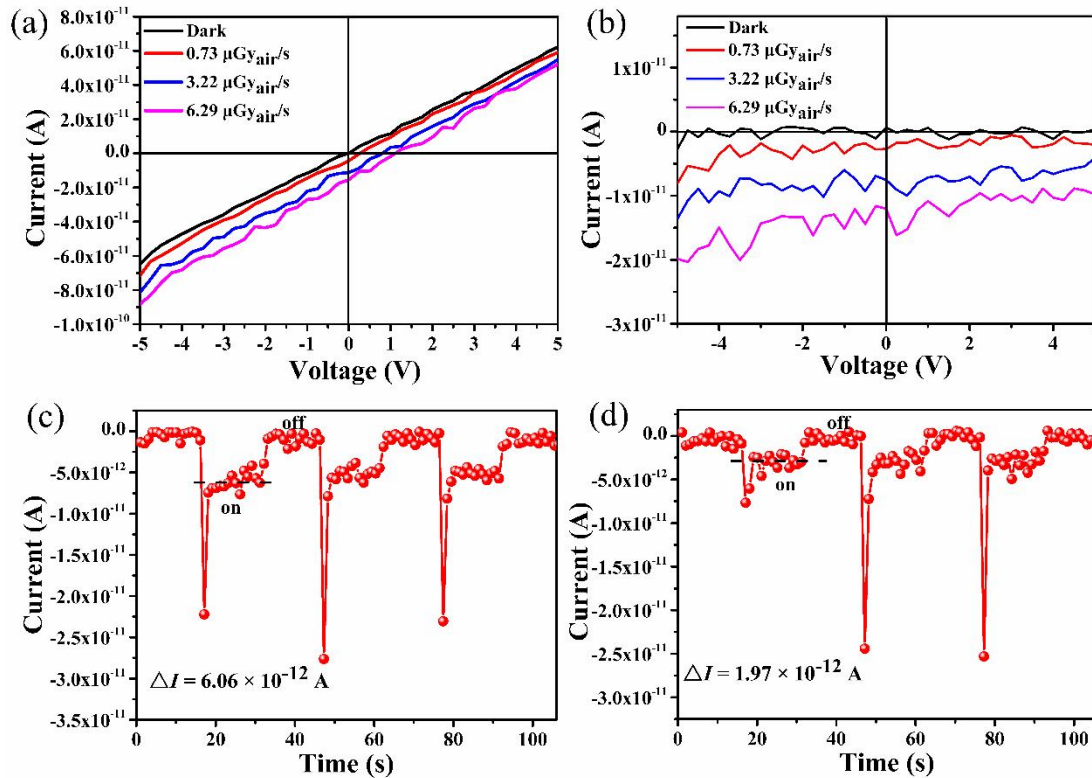

Fig. S12. The  $I$ - $V$  curves of the  $c$ -axis detector (a) and the air X-ray detector (b) under various X-ray doses. The X-ray photocurrent responses for the  $c$ -axis detector (c) and the air X-ray detector (d) under the same dose of  $0.73 \mu\text{Gy}_{\text{air}}/\text{s}$  and  $0 \text{ V}$  bias.

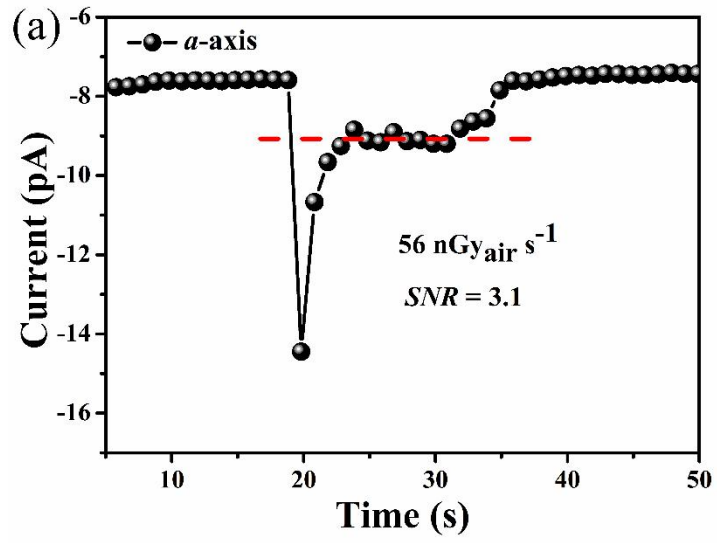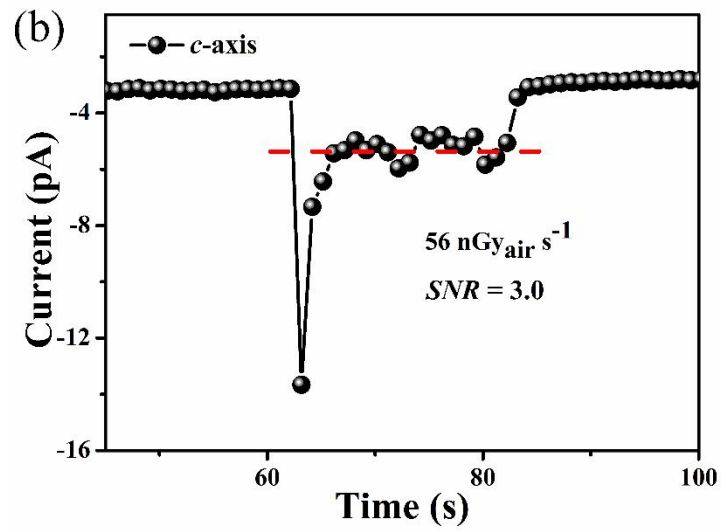

Fig. S13. The X-ray response of *a*-axis (a) and *c*-axis (b) detectors at an ultralow dose of  $56 \text{ nGy}_{\text{air}} \text{ s}^{-1}$ .



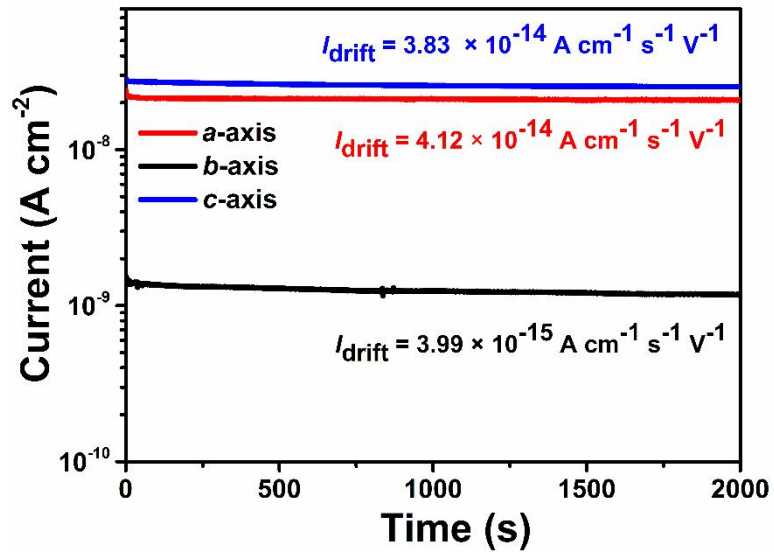

Fig. S14. Comparison of dark current drifts for the *a*-, *b*- and *c*-axes at 2 V bias.

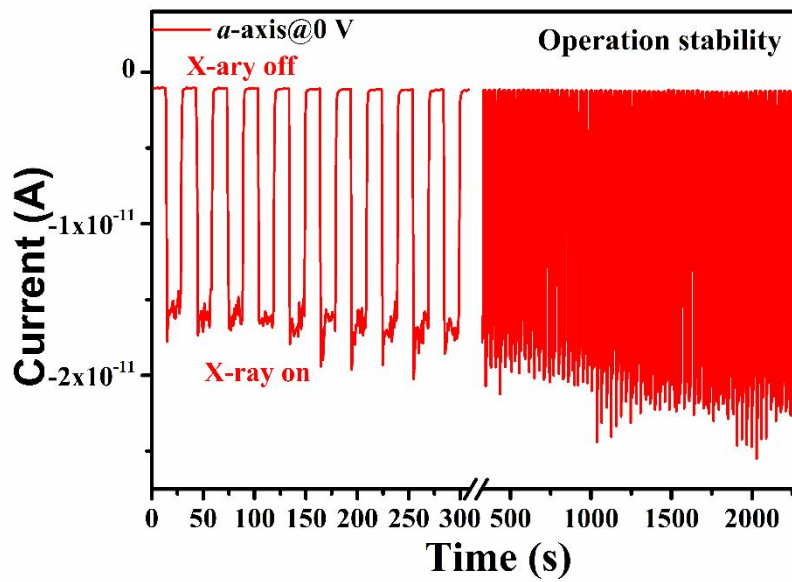

Fig. S15. Operation stability measurement of *a*-axis detector under repeated and continuous X-ray radiation at 0 V bias.

Table S1. Performance comparison of photodetectors based on perovskites.

| Devices                                                                  | $\lambda$ (nm) | Rise/decay time            | Responsivity<br>(mA W <sup>-1</sup> ) | Detectivity<br>(Jones) | Condition              | Ref.         |
|--------------------------------------------------------------------------|----------------|----------------------------|---------------------------------------|------------------------|------------------------|--------------|
| Si/MAPbBr <sub>3</sub> /Au                                               | 405            | 520 ns/2435 ns             | 13.6                                  | $5.9 \times 10^{10}$   | -1 V bias              | <sup>1</sup> |
| MAPbI <sub>3</sub> /CdS                                                  | 700            | 0.85 ms/2.24 ms            | 480                                   | $2.1 \times 10^{13}$   | 0 V bias               | <sup>2</sup> |
| Pt/MAPbBr <sub>3</sub> /Au                                               | 350            | 70 $\mu$ s/150 $\mu$ s     | 2                                     | $1.4 \times 10^{11}$   | 0 V bias               | <sup>3</sup> |
| Au/(4-TFBMA) <sub>2</sub> (DMA)Pb <sub>2</sub> I <sub>7</sub> /Au        | 550            | 264 $\mu$ s/380 $\mu$ s    | $1.97 \times 10^3$                    | $2.95 \times 10^{12}$  | 10 V bias              | <sup>4</sup> |
| Au/MAPbBr <sub>3</sub> /Au                                               | 515            | 27.6 $\mu$ s/15.8 $\mu$ s  | $5.57 \times 10^4$                    | $8 \times 10^{13}$     | 5 V bias               | <sup>5</sup> |
| ITO/PEDOT:PSS/MAPbI <sub>3</sub> /PFN<br>/PM6:Y6/C <sub>60</sub> /BCP/Ag | 860            | 1.73 $\mu$ s/ 0.97 $\mu$ s | 577                                   | $1.52 \times 10^{13}$  | 0 V bias               | <sup>6</sup> |
| SWCNT/CsPbBr <sub>3</sub> /SWCNT                                         | 505            | 13 ms/ 22 ms               | $1.321 \times 10^6$                   | $7.7 \times 10^{12}$   | 5 V bias               | <sup>7</sup> |
| C/EA <sub>4</sub> Pb <sub>3</sub> Br <sub>10</sub> /C                    | 425            | 20 ns/ 120 ns              | 0.22                                  | $1.01 \times 10^{10}$  | 0 V<br>(ferroelectric) | This<br>work |

1. X. Geng, F. Wang, H. Tian, Q. Feng, H. Zhang, R. Liang, Y. Shen, Z. Ju, G.-Y. Gou, N. Deng, Y.-t. Li, J. Ren, D. Xie, Y. Yang and T.-L. Ren, Ultrafast Photodetector by Integrating Perovskite Directly on Silicon Wafer, *ACS Nano*, 2020, **14**, 2860-2868.
2. F. Cao, L. Meng, M. Wang, W. Tian and L. Li, Gradient Energy Band Driven High-Performance Self-Powered Perovskite/CdS Photodetector, *Adv. Mater.*, 2019, **31**, 1806725.
3. P. A. Shaikh, D. Shi, J. R. D. Retamal, A. D. Sheikh, M. A. Haque, C.-F. Kang, J.-H. He, O. M. Bakr and T. Wu, Schottky junctions on perovskite single crystals: light-modulated dielectric constant and self-biased photodetection, *J. Mater. Chem. C*, 2016, **4**, 8304-8312.
4. W. Guo, H. Chen, X. Liu, Y. Ma, J. Wang, Y. Liu, S. Han, H. Xu, J. Luo and Z. Sun, Rational alloying of secondary and aromatic ammonium cations in a metal-halide perovskite toward crystal-array photodetection, *Sci. China Mater.*, 2021, **65**, 179-185.
5. Y. Liu, Y. Zhang, Z. Yang, J. Feng, Z. Xu, Q. Li, M. Hu, H. Ye, X. Zhang, M. Liu, K. Zhao and S. Liu, Low-temperature-gradient crystallization for multi-inch high-quality perovskite single crystals for record performance photodetectors, *Mater. Today*, 2019, **22**, 67-75.
6. Y. Zhang, Z. Qin, X. Huo, D. Song, B. Qiao and S. Zhao, High-Performance Near-Infrared Photodetectors Based on the Synergy Effect of Short Wavelength Light Filter and Long Wavelength Response of a Perovskite/Polymer Hybrid Structure, *ACS Appl. Mater. Interfaces*, 2021, **13**, 61818-61826.
7. A. A. Marunchenko, M. A. Baranov, E. V. Ushakova, D. R. Ryabov, A. P. Pushkarev, D. S. Gets, A. G. Nasibulin and S. V. Makarov, Single-Walled Carbon Nanotube Thin Film for Flexible and Highly Responsive Perovskite Photodetector, *Adv. Funct. Mater.*, 2022, **32**, 2109834.
